# Supplementary material for: Evidence Suggesting Absence of Mitochondrial DNA Methylation
Source: PubMed Central journal article supplement (PMC5671948; doi:10.3389/fgene.2017.00166), 2017-11-01
Supplement: Image_1.pdf [file Image_1.pdf]

*Supplementary Material*

**Evidence suggesting absence of mitochondrial DNA methylation**

**Mie Mehta, Lars Roed Ingerslev, Odile Fabre, Martin Picard, and Romain Barrès\***

\* **Correspondence:** Corresponding Author: [barres@sund.ku.dk](mailto:barres@sund.ku.dk)

**Supplementary Figure 1. Methylation of mtDNA and sequencing depth are inversely correlated in human cells and mouse skeletal muscle.** The number of reads and methylation percentage are shown in the mitochondrial genome from position (A) 0-3000 antisense (B) 4900-6900 sense, (C) 4900-6900 antisense (D)14000-16000 sense and (E) 14000-16000 antisense. In red, human HEK293 cells; in green, human primary muscle cells (Lonza); in blue, mouse skeletal muscle. We analysed all cytosines in each of the samples corresponding to between 6,000-12,000 cytosines.

**A**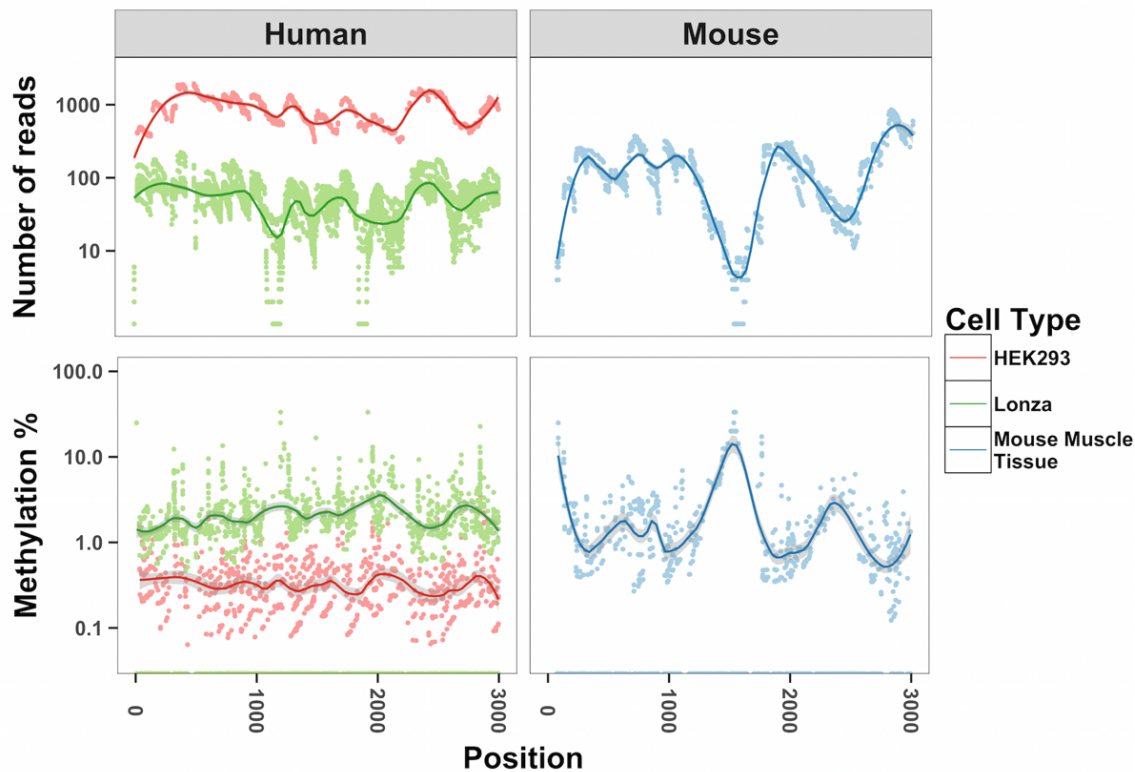

**B**

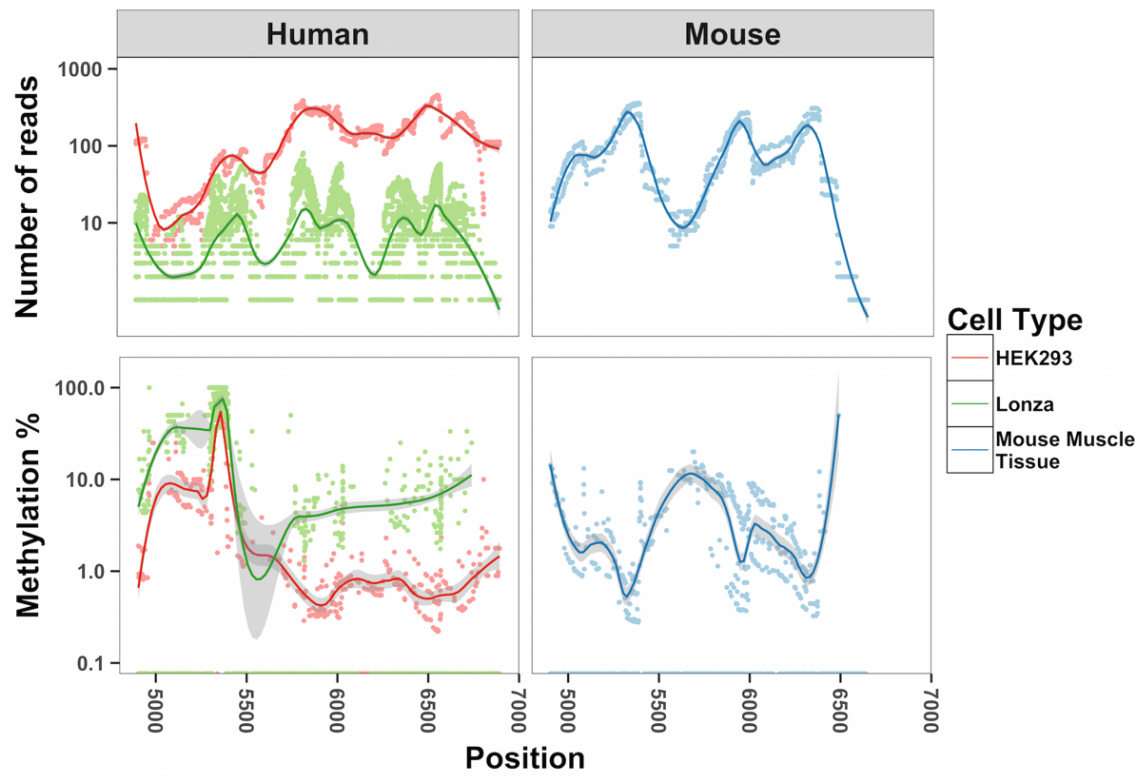

**C**

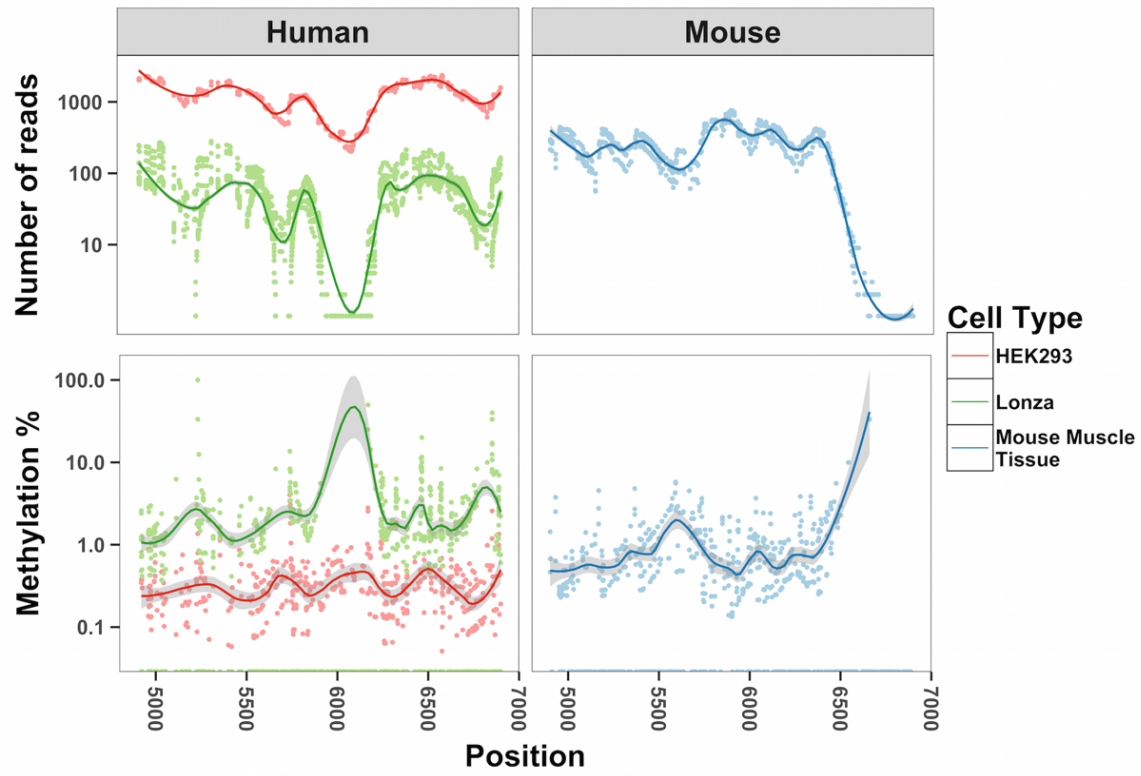

**D**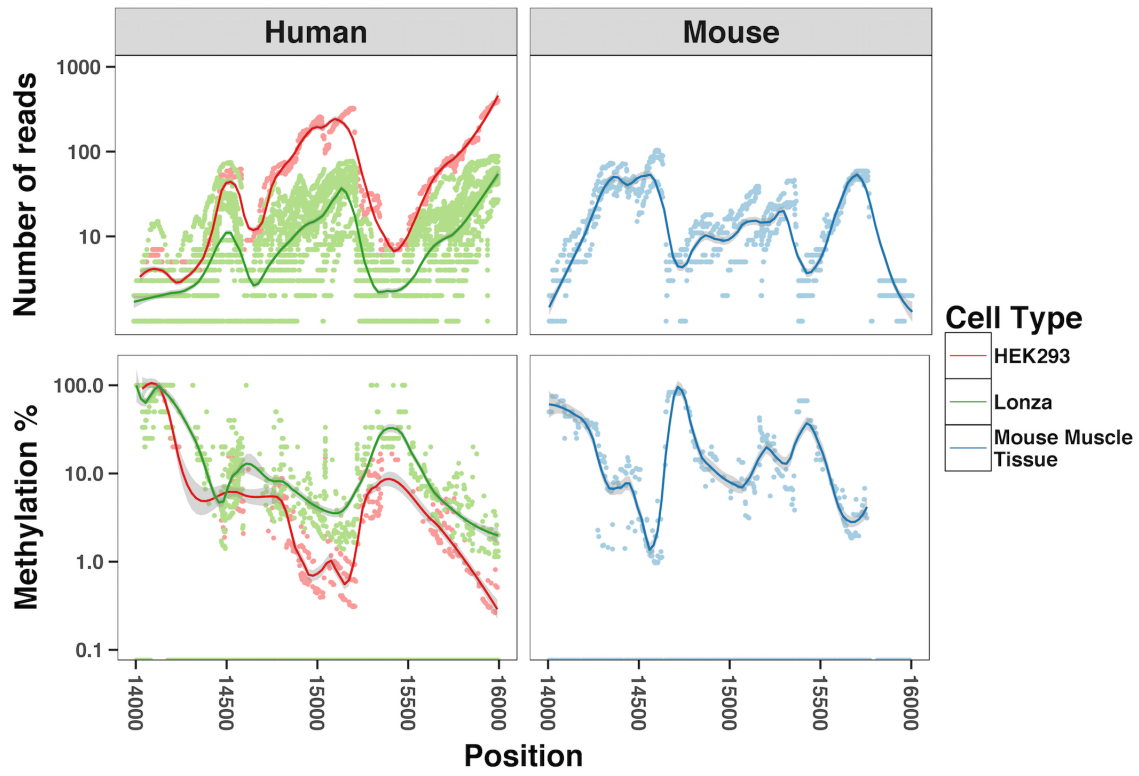**E**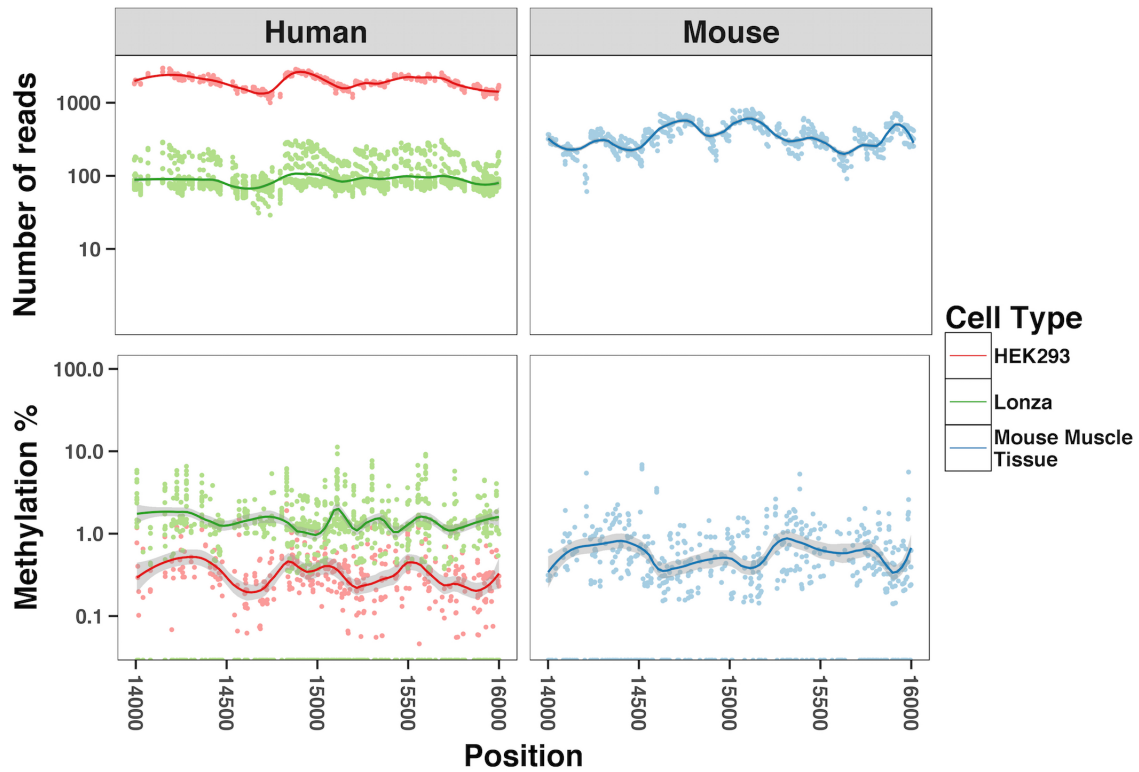

**Supplementary Figure 2. Role of NUMTs in mtDNA methylation levels.** (A) Correlation between mtDNA methylation and NUMT length ( $R=0.06$ ,  $P=0.11$ ). (B) Correlation between mtDNA methylation and NUMT score ( $R=-0.1$ ,  $P=0.006$ ). The NUMT score is described elsewhere (Ramos et al. 2011) and is a score representing how well each NUMTs align to mtDNA.

**A**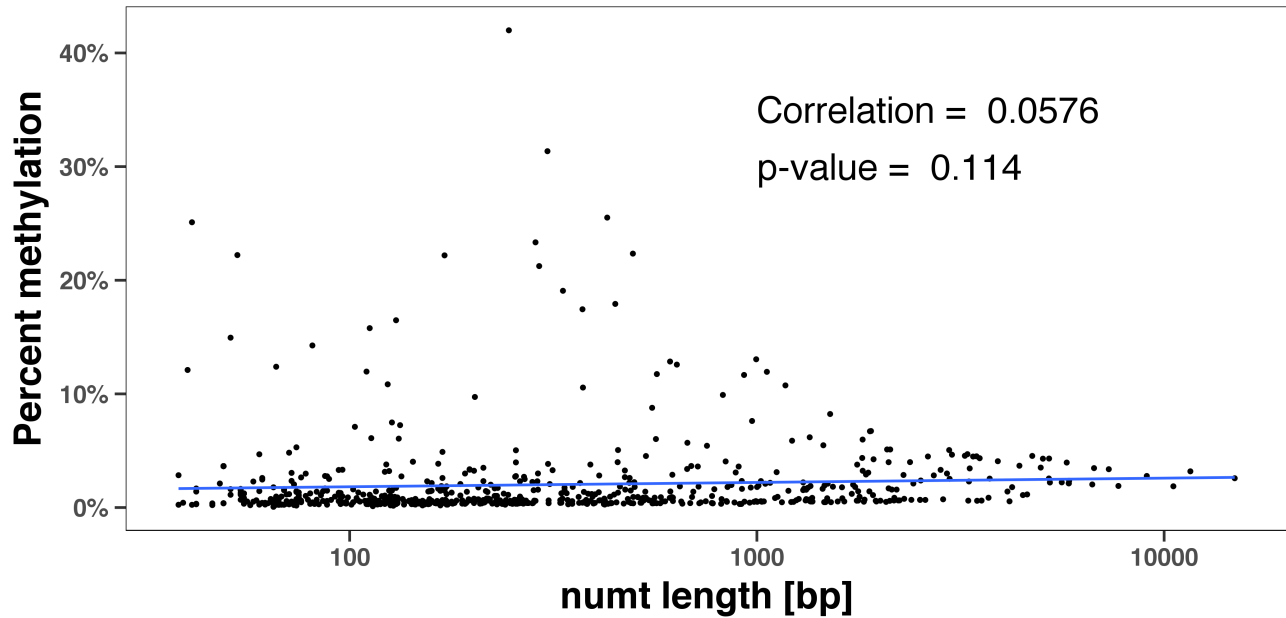**B**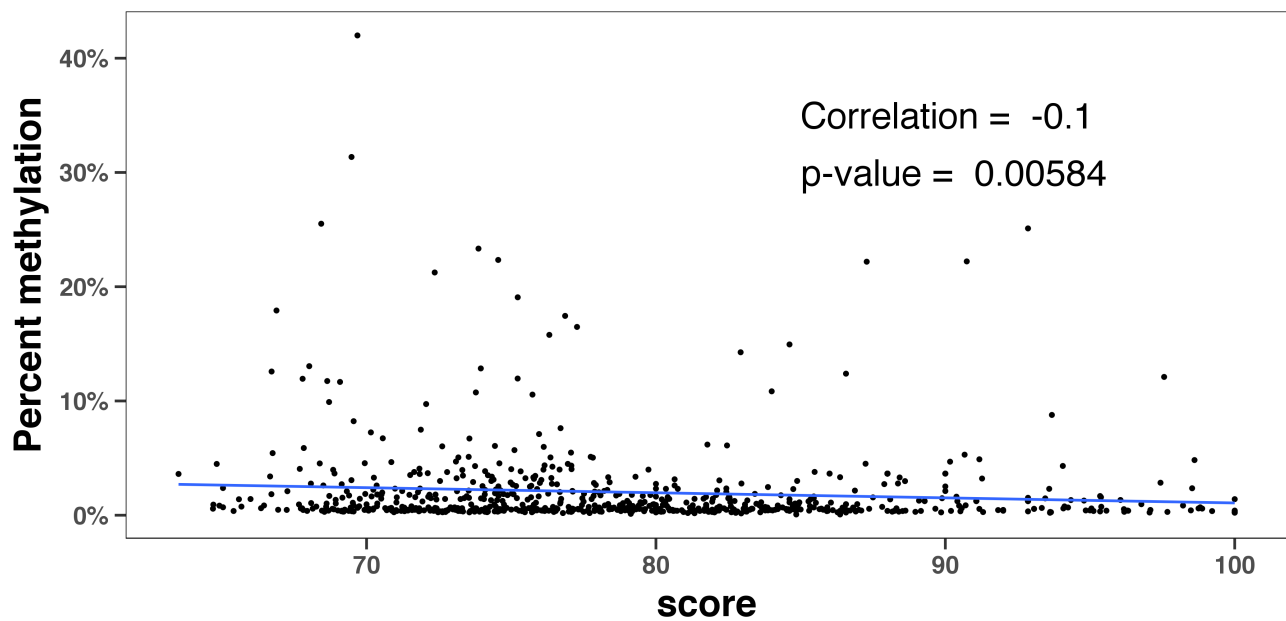

## REFERENCE

Ramos, A. et al., 2011. Nuclear insertions of mitochondrial origin: Database updating and usefulness in cancer studies. *Mitochondrion*, 11(6), pp.946–953.
